# Supplementary material
Source: bioRxiv or medRxiv preprint supplement (https://www.biorxiv.org/highwire/filestream/61262/field_highwire_adjunct_files/7/197855-6.pdf)

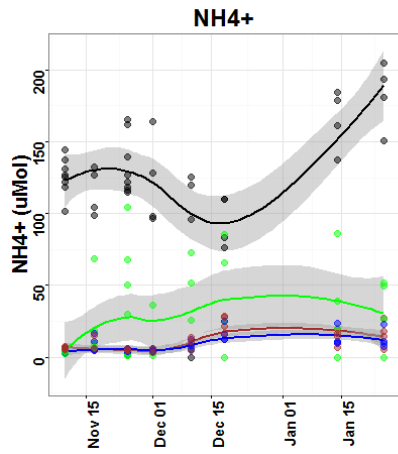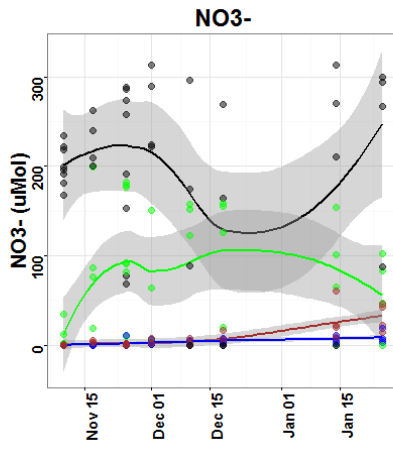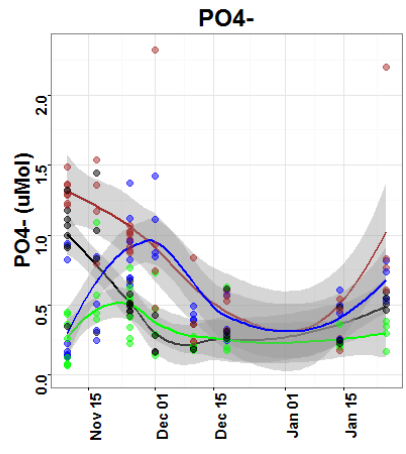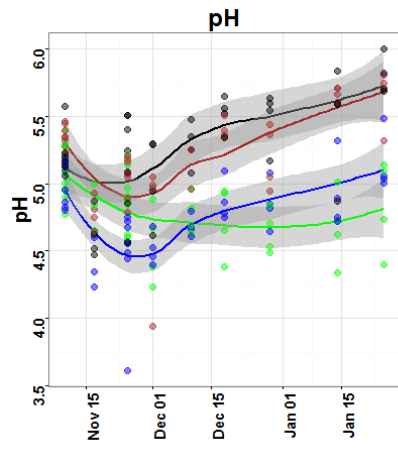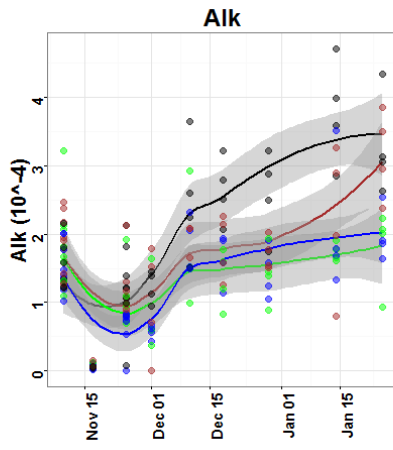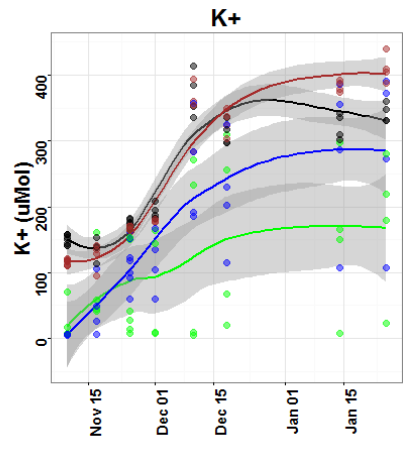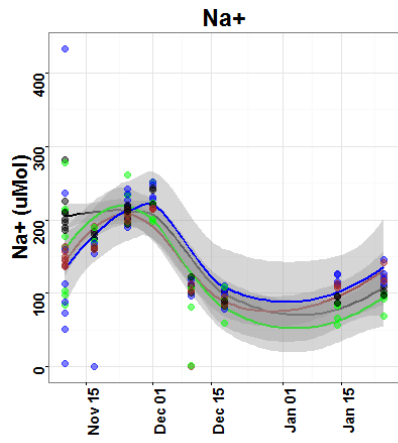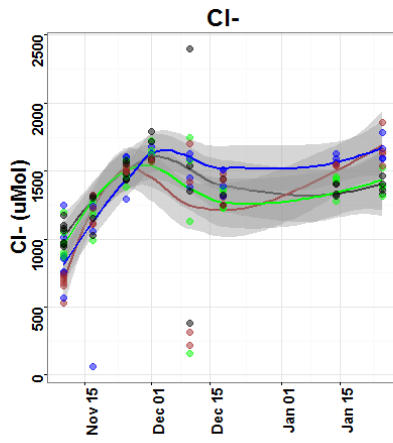

Supplement: Supplementary file [file 197855-6.pdf]
